# Supplementary material for: Ni2P nanowire arrays grown on Ni foam as an efficient monolithic cocatalyst for visible light dye-sensitized H2 evolution
Source: Royal Society of Chemistry journal article supplement (doi:10.1039/d2dt01402e), 2022-01-01
Supplement: d2dt01402e1.pdf [file d2dt01402e1.pdf]

**Electronic Supplementary Information for**  
**Ni<sub>2</sub>P nanowire arrays grown on Ni foam as an efficient**  
**monolithic cocatalyst for visible light dye-sensitized H<sub>2</sub>**  
**evolution**

Fang Wang, Tongliang Liu, Zhaoting Liu, Zhengguo Zhang and Shixiong Min\*

*School of Chemistry and Chemical Engineering, North Minzu University, Yinchuan,  
750021, P. R. China.*

\*Corresponding authors: [sxmin@nwnu.edu.cn](mailto:sxmin@nwnu.edu.cn)

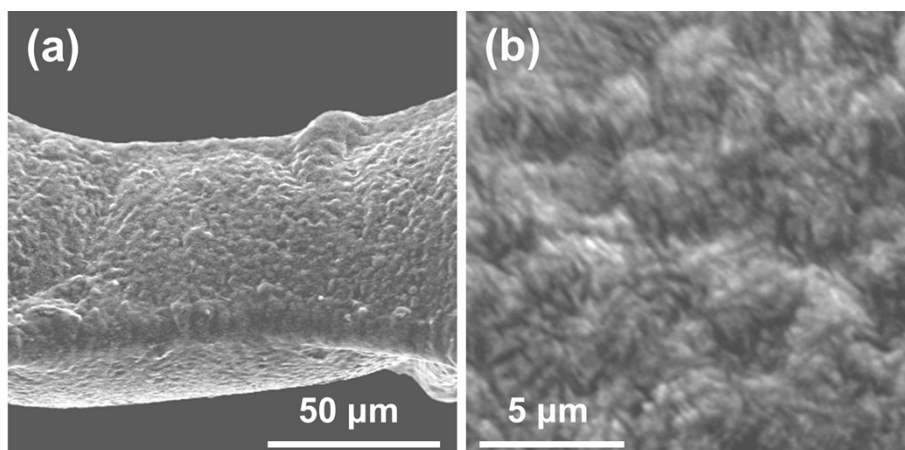

**Fig. S1** SEM images of Ni<sub>2</sub>P NL/NF.

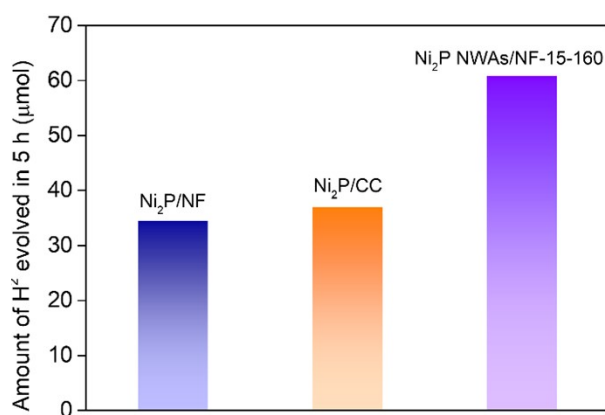

**Fig. S2** Photocatalytic HER activities of Ni<sub>2</sub>P/CC, Ni<sub>2</sub>P/NF, and NWAs/NF-15-160 from ErB-TEOA (10 vol.%, 25 mL, pH 10) system. The Ni<sub>2</sub>P/CC and Ni<sub>2</sub>P/NF were prepared by drop-coating Ni<sub>2</sub>P powder on carbon paper ( $d=1.6$  cm) and NF ( $d=1.6$  cm), respectively. The loading amount of Ni<sub>2</sub>P in Ni<sub>2</sub>P/CC and Ni<sub>2</sub>P/NF was same as in NWAs/NF-15-160.

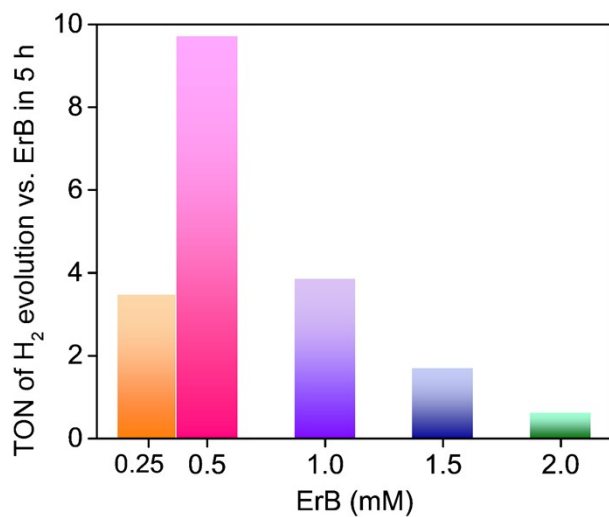

**Fig. S3** TON of H<sub>2</sub> evolution based on ErB on Ni<sub>2</sub>P NWAs/NF-15-160 from ErB-TEOA (10 vol.%, 25 mL, pH 10) system.

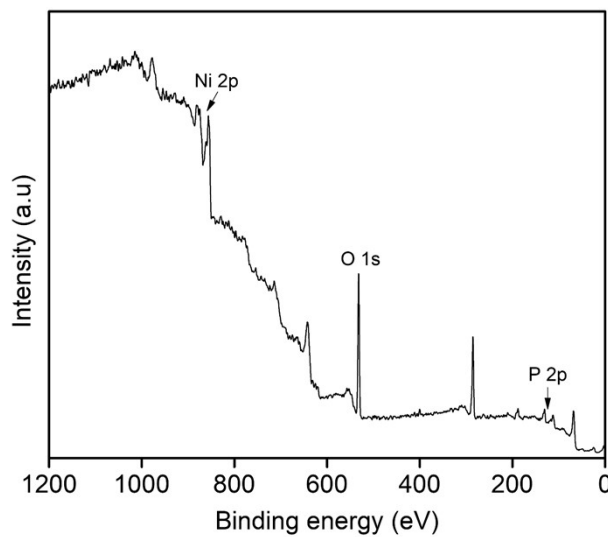

**Fig. S4** XPS survey spectrum of Ni<sub>2</sub>P NWAs/NF-15-160 after photocatalytic HER.

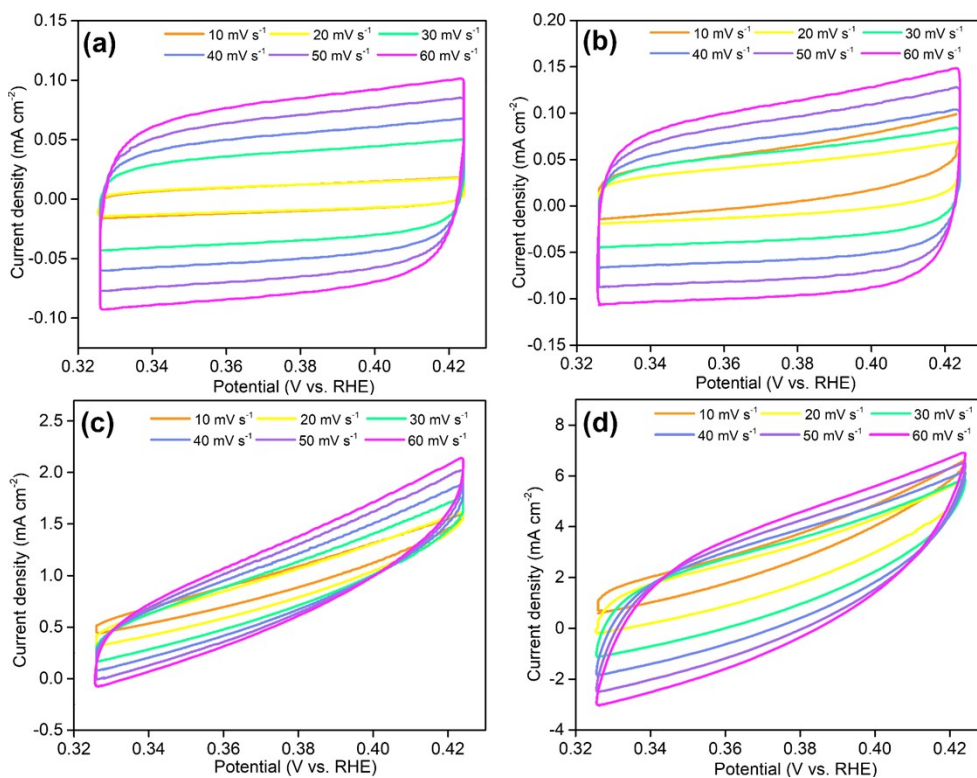

**Fig. S5** Cyclic voltammograms (CV) of (a) pristine NF, (b) NF-O-15-160, (c) Ni<sub>2</sub>P NL/NF and (d) Ni<sub>2</sub>P NWAs/NF-15-160 at different scan rates in 0.5 M Na<sub>2</sub>SO<sub>4</sub> solution.

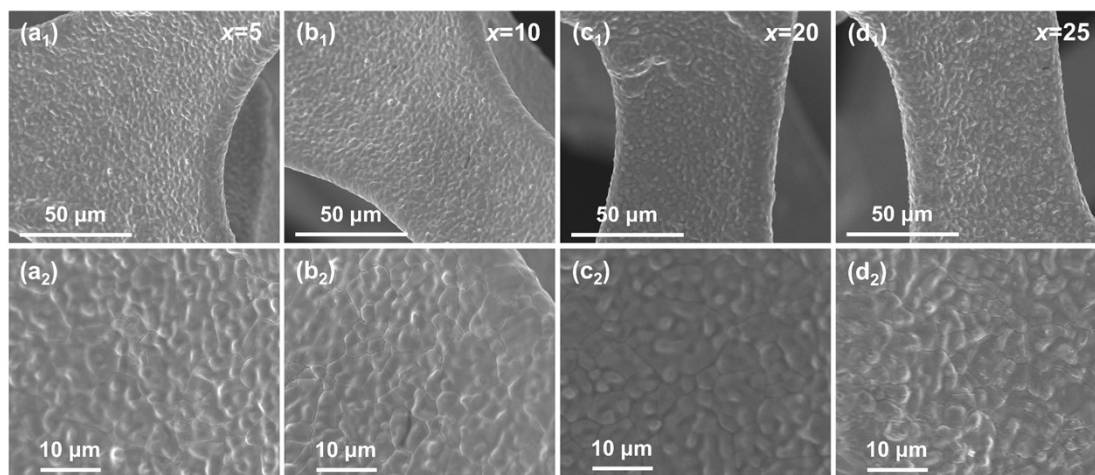

**Fig. S6** SEM images of NF-O-*x*-160 samples, where the “*x*” and “160” represent the concentration of H<sub>2</sub>O<sub>2</sub> and hydrothermal temperature, respectively.

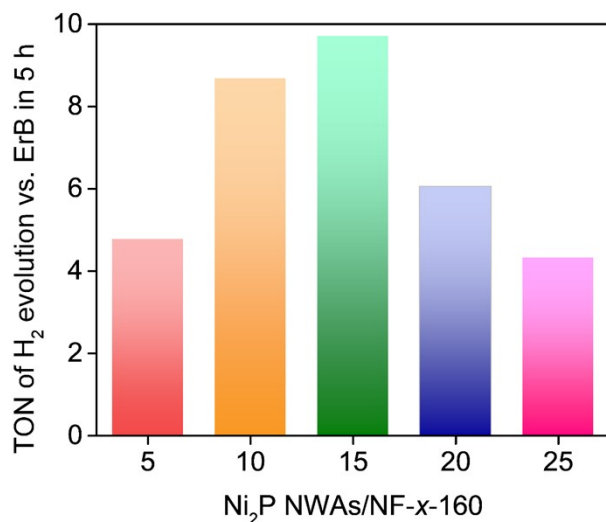

**Fig. S7** TON of H<sub>2</sub> evolution on Ni<sub>2</sub>P NWAs/NF-x-160 from TEOA solution (10 vol.%, 25 mL, pH 10) containing ErB (0.5 mM) under visible light irradiation.

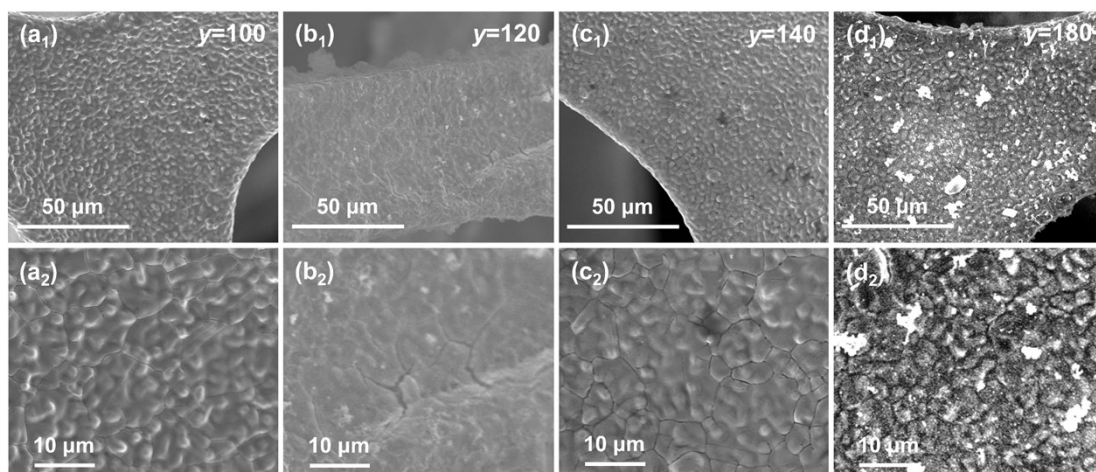

**Fig. S8** SEM images of NF-O-15-y samples, where the “15” and “y” represent the concentration of H<sub>2</sub>O<sub>2</sub> and hydrothermal temperature, respectively.

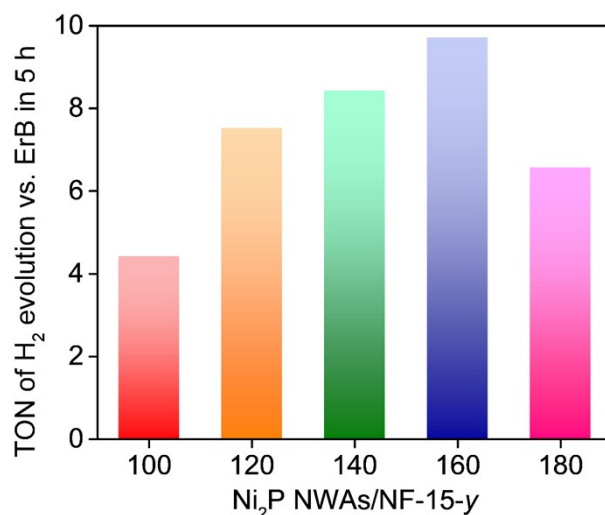

**Fig. S9** TON of H<sub>2</sub> evolution on Ni<sub>2</sub>P NWAs/NF-*x*-160 from TEOA solution (10 vol.%, 25 mL, pH 10) containing ErB (0.5 mM) under visible light irradiation.

**Table S1** Comparison of photocatalytic HER activity of dye-sensitized Ni<sub>2</sub>P NWAs/NF with other photocatalysts with Ni<sub>2</sub>P as cocatalyst.

| Photocatalyst                                                                               | Form     | Reaction conditions                                                 | Light source               | H <sub>2</sub> evolution rate (mmol h <sup>-1</sup> g <sub>catalyst</sub> <sup>-1</sup> ) | Ref. |
|---------------------------------------------------------------------------------------------|----------|---------------------------------------------------------------------|----------------------------|-------------------------------------------------------------------------------------------|------|
| Ni <sub>2</sub> P-CdS/g-C <sub>3</sub> N <sub>4</sub>                                       | Powder   | 0.35 M Na <sub>2</sub> S and 0.25 M Na <sub>2</sub> SO <sub>3</sub> | 300 W Xe lamp (>400 nm)    | 44.45                                                                                     | 1    |
| Cd <sub>0.5</sub> Zn <sub>0.5</sub> S@ZnS-Ni <sub>2</sub> P/g-C <sub>3</sub> N <sub>4</sub> | Powder   | 0.35 M Na <sub>2</sub> S and 0.25 M Na <sub>2</sub> SO <sub>3</sub> | 300 W Xe lamp (>420 nm)    | 55.43                                                                                     | 2    |
| Ni <sub>12</sub> P <sub>5</sub> /g-C <sub>3</sub> N <sub>4</sub>                            | Powder   | 10 vol% TEOA                                                        | 350 W Xe lamp (>420 nm)    | 0.12                                                                                      | 3    |
| Ni <sub>2</sub> P/CdS-DETA                                                                  | Powder   | 0.35 M Na <sub>2</sub> S and 0.25 M Na <sub>2</sub> SO <sub>3</sub> | 300 W Xe lamp (>420 nm)    | 6.83                                                                                      | 4    |
| Ni <sub>2</sub> P/CdS                                                                       | Powder   | 10 vol.% Lactic acid                                                | 300 W Xe lamp (>420 nm)    | 1.18                                                                                      | 5    |
| Ni <sub>2</sub> P-Cd <sub>0.9</sub> Zn <sub>0.1</sub> S                                     | Powder   | 0.7 M Na <sub>2</sub> S and 0.5 M Na <sub>2</sub> SO <sub>3</sub>   | 300 W Xe lamp (>400 nm)    | 94                                                                                        | 6    |
| MoS <sub>2</sub> -g-C <sub>3</sub> N <sub>4</sub> /Ni <sub>2</sub> P                        | Powder   | 10 vol.% TEOA                                                       | 300 W Xe lamp (>420 nm)    | 0.29                                                                                      | 7    |
| C-Ni <sub>2</sub> P@CdS                                                                     | Powder   | 10 vol.% TEOA                                                       | 300 W Xe lamp (>420 nm)    | 28.39                                                                                     | 8    |
| Ni <sub>2</sub> P/ZnIn <sub>2</sub> S <sub>4</sub>                                          | Powder   | 10 vol.% Lactic acid                                                | 300 W Xe lamp (>420 nm)    | 2.06                                                                                      | 9    |
| NiO/Ni <sub>2</sub> P/g-C <sub>3</sub> N <sub>4</sub>                                       | Powder   | 10 vol.% TEOA                                                       | 300 W Xe lamp (>420 nm)    | 0.50                                                                                      | 10   |
| 7-Ni <sub>2</sub> P/MoP@g-C <sub>3</sub> N <sub>4</sub>                                     | Powder   | 10 vol.% TEOA                                                       | 300 W Xe lamp (>420 nm)    | 0.52                                                                                      | 11   |
| NiCoP/g-C <sub>3</sub> N <sub>4</sub>                                                       | Powder   | 10 vol.% CH <sub>3</sub> OH                                         | 300 W Xe lamp (300-700 nm) | 0.16                                                                                      | 12   |
| Ni <sub>2</sub> P/TiO <sub>2</sub> /Ti <sub>3</sub> C <sub>2</sub> -ox                      | Powder   | 5 vol.% glycerol                                                    | 35 W UV-visible lamp       | 16.1                                                                                      | 13   |
| Ti <sub>3</sub> AlC <sub>2</sub> /TiO <sub>2</sub> /Ni <sub>2</sub> P                       | Powder   | 5 vol.% glycerol                                                    | 35 W UV-visible lamp       | 4.3                                                                                       | 14   |
| Ag/pCN-TiO <sub>2</sub>                                                                     | Monolith | 5 vol.% CH <sub>3</sub> OH                                          | 200 W Hg lamp              | 8.2                                                                                       | 15   |

|                           |          |                  |                           |      |           |
|---------------------------|----------|------------------|---------------------------|------|-----------|
| Ag-pCN/TiO <sub>2</sub>   | Monolith | 5 vol.% glycerol | 200 W Hg lamp             | 12.1 | 16        |
| Ni <sub>2</sub> P NWAs/NF | Monolith | 10 vol% TEOA     | 10W LED (380 nm≤λ≤780 nm) | 0.96 | This work |

## References

1. T. F. Wu, P. F. Wang, J. Qian, Y. H. Ao, C. Wang and J. Hou, *Dalton Trans.*, 2017, **46**, 13793-1380.
2. X. W. Ma, Q. Q. Ruan, J. K. Wu, Y. Zuo, X. P. Pu and H. F. Lin, *Dalton Trans.*, 2020, **49**, 6259-6269.
3. J. Q. Wen, J. Xie, R. C. Shen, X. Li, X. Y. Luo, H. D. Zhang, A. P. Zhang and G. C. Bi, *Dalton Trans.*, 2017, **46**, 1794-1802.
4. T. P. Hua, K. Dai, J. F. Zhang, G. P. Zhu and C. H. Liang, *Appl. Surf. Sci.*, 2019, **481**, 1385-1393.
5. Z. Q. Wang, Z. L. Qi, X. J. Fan, D. Y. Leung, J. L. Long, Z. Z. Zhang, T. F. Miao, S. G. Meng, S. F. Chen and X. L. Fu, *Appl. Catal. B. Environ.*, 2021, **281**, 119443.
6. Z. W. Shao, X. Meng, H. Lai, D. F. Zhang, X. P. Pu, C. H. Su, H. Li, X. Z. Ren and Y. L. Geng, *Chin. J. Catal.*, 2021, **42**, 439-449.
7. G. Z. Liang, M. H. Waqas, B. Yang, K. Xiao, J. Y. Li, C. Z. Zhu, J. M. Zhang and H. B. Duan, *Appl. Surf. Sci.*, 2019, **504**, 144448.
8. C. Zhang, S. P. Chu, B. Q. Liu, Y. Liu, Z. M. Guo and Z.G. Lv, *Appl. Surf. Sci.*, 2021, **569**, 150987.
9. X. L. Li, X. J. Wang, J. Y. Zhu, Y. P. Li, J. Zhao and F. T. Li, *Chem. Eng. J.*, 2018, **353**, 15-24.
10. J. W. Shi, Y. J. Zou, L. H. Cheng, D. D. Ma, D. K. Sun, S. M. Mao, L. W. Sun, C. He and Z. Y. Wang, *Chem. Eng. J.*, 2019, **378**, 122161.
11. J. P. Zhao, B. Fu, X. Li, Z. H. Ge, B. Ma and Y. T. Chen, *ACS Appl. Energy Mater.*, 2020, **3**, 10910-10919.
12. B. Ma, J. P. Zhao, Z. H. Ge, Y. T. Chen and Z. H. Yuan, *Sci. China Mater.*, 2020, **63**, 258-266.
13. M. Tahir, *Energy Fuels* 2021, **35**, 14197-14211.
14. S. Tasleem, M. Tahir and Z. Y. Zakaria, *J. Alloys Compd.*, 2020, **842**, 155752.

15. N. Fajrina and M. Tahir, *Int. J. Hydrogen Energ.*, 2020, 45, 4355-4375.
16. S. Tasleem and M. Tahir, *J. Environ. Chem. Eng.*, 2021, 9, 105351.
